# Supplementary material for: A Likelihood Ratio Approach for Utilizing Case-Control Data in the Clinical Classification of Rare Sequence Variants: Application to BRCA1 and BRCA2
Source: Hindawi journal article supplement (doi:10.1155/2023/9961341), 2023-09-14
Supplement: f3 [file 9961341.f3.pdf]

A likelihood ratio approach for utilizing case-control data in the clinical classification of rare sequence variants: application to BRCA1 and BRCA2  
 Supplementary Table S5. Case-control likelihood ratios and evidence for assignment to ACMG/AMP code strengths for the 92 BRCA1 and BRCA2 variants, using country-specific analyses with different penetrance models

| Gene  | Variant_ID (RCR37/hg19)  | HGVS nucleotide   | HGVS protein        | ClinVar Class       | Total cases | Total controls | Case Carriers               |                  | Control Carriers            |                  | Country-stratified analysis (main analysis [Dorling et al. 2021]) |                                | Country-stratified analysis using country-specific incidences [Dorling et al. 2021] |                                | Country-stratified analysis [Kuchenbaecker et al. 2017] |                                | Country-stratified analysis [Antonucci et al. 2003] |                                | Country-stratified analysis [Li et al. 2021] |                                | Country-unstratified analysis [Dorling et al. 2021] |                                |
|-------|--------------------------|-------------------|---------------------|---------------------|-------------|----------------|-----------------------------|------------------|-----------------------------|------------------|-------------------------------------------------------------------|--------------------------------|-------------------------------------------------------------------------------------|--------------------------------|---------------------------------------------------------|--------------------------------|-----------------------------------------------------|--------------------------------|----------------------------------------------|--------------------------------|-----------------------------------------------------|--------------------------------|
|       |                          |                   |                     |                     |             |                | N (Frequency)               | %Age             | N (Frequency)               | %Age             | LR                                                                | ACMG/AMP evidence strength P&I | LR                                                                                  | ACMG/AMP evidence strength P&I | LR                                                      | ACMG/AMP evidence strength P&I | LR                                                  | ACMG/AMP evidence strength P&I | LR                                           | ACMG/AMP evidence strength P&I | LR                                                  | ACMG/AMP evidence strength P&I |
| BRCA1 | chr17_41196683_C         | c.1012A>G         | p.?                 | -                   | 72564       | 50781          | 1 (1.38x10 <sup>-5</sup> )  | 55               | 1 (1.97x10 <sup>-5</sup> )  | 56               | 0.09                                                              | Benign Moderate                | 0.09                                                                                | Benign Moderate                | 0.03                                                    | Benign Strong                  | 0.01                                                | Benign Strong                  | 0.17                                         | Benign Moderate                | 0.14                                                | Benign Moderate                |
| BRCA1 | chr17_41197404_A         | c.291C>T          | p.?                 | Uncertain           | 72523       | 50754          | 81 (1.10x10 <sup>-4</sup> ) | 56,449 (73-69)   | 12 (2.36x10 <sup>-5</sup> ) | 59,621 (72-74)   | 5.14x10 <sup>-9</sup>                                             | Benign Very Strong             | 3.11x10 <sup>-9</sup>                                                               | 2.65x10 <sup>-12</sup>         | Benign Very Strong                                      | 9.56x10 <sup>-11</sup>         | Benign Very Strong                                  | 1.96x10 <sup>-7</sup>          | Benign Very Strong                           | 1.82x10 <sup>-7</sup>          | Benign Very Strong                                  |                                |
| BRCA1 | chr17_41267714_A         | c.136A>T          | p.?                 | -                   | 72453       | 50706          | 2 (2.76x10 <sup>-5</sup> )  | 381,4 (37-39)    | 1 (1.97x10 <sup>-5</sup> )  | 42               | 2.69                                                              | No evidence                    | 2.70                                                                                | No evidence                    | 1.93                                                    | No evidence                    | 1.74                                                | No evidence                    | 1.74                                         | No evidence                    | 5.92                                                | No evidence                    |
| BRCA1 | chr17_4126831_A          | c.138C>G          | p.(Ala62Val)        | Benign              | 72545       | 50769          | 14 (1.93x10 <sup>-4</sup> ) | 58,111.2 (39-72) | 11 (2.17x10 <sup>-5</sup> ) | 53,621 (25-77)   | 7.28x10 <sup>-10</sup>                                            | Benign Very Strong             | 2.21x10 <sup>-10</sup>                                                              | 5.14x10 <sup>-13</sup>         | Benign Very Strong                                      | 5.38x10 <sup>-15</sup>         | Benign Very Strong                                  | 2.96x10 <sup>-7</sup>          | Benign Very Strong                           | 5.72x10 <sup>-5</sup>          | No evidence                                         |                                |
| BRCA1 | chr17_41245577_C         | c.397A>G          | p.(=)               | Benign              | 72561       | 50778          | 4 (5.51x10 <sup>-5</sup> )  | 47,619 (37-52)   | 1 (1.97x10 <sup>-5</sup> )  | 56               | 3.05                                                              | No evidence                    | 3.63                                                                                | No evidence                    | 1.42                                                    | No evidence                    | 0.69                                                | No evidence                    | 4.11                                         | No evidence                    | 1.44                                                | No evidence                    |
| BRCA1 | chr17_41245445_T         | c.3203G>A         | p.(Asp695Asn)       | Conflicting         | 72564       | 50782          | 4 (5.51x10 <sup>-5</sup> )  | 44,510.9 (32-58) | 7 (1.38x10 <sup>-5</sup> )  | 57,413.6 (38-75) | 1.30x10 <sup>-4</sup>                                             | Benign Very Strong             | 9.76x10 <sup>-5</sup>                                                               | 2.07x10 <sup>-6</sup>          | Benign Very Strong                                      | 1.24x10 <sup>-5</sup>          | Benign Very Strong                                  | 1.11x10 <sup>-3</sup>          | Benign Very Strong                           | 6.68x10 <sup>-5</sup>          | Benign Very Strong                                  |                                |
| BRCA1 | chr17_41244982_T         | c.256C>G          | p.(Tyr856His)       | Benign              | 72565       | 50780          | 2 (2.76x10 <sup>-5</sup> )  | 59,0 (59-59)     | 1 (1.97x10 <sup>-5</sup> )  | 55               | 0.11                                                              | Benign Moderate                | 0.11                                                                                | Benign Moderate                | 0.04                                                    | Benign Strong                  | 0.01                                                | Benign Strong                  | 0.23                                         | Benign Moderate                | 0.11                                                | Benign Moderate                |
| BRCA1 | chr17_41244886_A         | c.2660C>T         | p.(His888Tyr)       | Conflicting         | 72557       | 50774          | 4 (5.51x10 <sup>-5</sup> )  | 52,544.2 (47-57) | 5 (9.85x10 <sup>-5</sup> )  | 53,247.4 (46-65) | 6.83x10 <sup>-5</sup>                                             | Benign Very Strong             | 7.71x10 <sup>-5</sup>                                                               | 2.16x10 <sup>-6</sup>          | Benign Very Strong                                      | 8.54x10 <sup>-6</sup>          | Benign Very Strong                                  | 6.33x10 <sup>-4</sup>          | Benign Very Strong                           | 1.23x10 <sup>-1</sup>          | Benign Very Strong                                  |                                |
| BRCA1 | chr17_41243840_A         | c.3708T>G         | p.(Asn1236Val)      | Benign              | 72562       | 50779          | 45 (6.20x10 <sup>-4</sup> ) | 57,910.8 (34-74) | 45 (8.86x10 <sup>-4</sup> ) | 54,824.0 (30-78) | 4.93x10 <sup>-4</sup>                                             | Benign Very Strong             | 2.77x10 <sup>-5</sup>                                                               | 8.53x10 <sup>-8</sup>          | Benign Very Strong                                      | 6.28x10 <sup>-5</sup>          | Benign Very Strong                                  | 1.94x10 <sup>-25</sup>         | Benign Very Strong                           | -                              | -                                                   |                                |
| BRCA1 | chr17_41243655_GAA_INDEL | c.3891_3893delTTC | p.(Ser1298del)      | Uncertain           | 72563       | 50781          | -                           | -                | 2 (3.94x10 <sup>-5</sup> )  | 431.4 (42-44)    | 0.04                                                              | Benign Strong                  | 0.02                                                                                | Benign Strong                  | 0.02                                                    | Benign Strong                  | 0.05                                                | Benign Moderate                | 0.02                                         | Benign Strong                  | 0.02                                                | Benign Strong                  |
| BRCA1 | chr17_41243494_C         | c.405G>A          | p.(Glu1352Val)      | Benign              | 72557       | 50777          | 1 (1.38x10 <sup>-5</sup> )  | 65               | -                           | -                | 0.64                                                              | No evidence                    | 0.64                                                                                | No evidence                    | 0.59                                                    | No evidence                    | 0.58                                                | No evidence                    | 0.83                                         | No evidence                    | 0.73                                                | No evidence                    |
| BRCA1 | chr17_41243449_C         | c.409G>3A>G       | p.(=)               | Uncertain           | 72562       | 50778          | 4 (5.51x10 <sup>-5</sup> )  | 63,510.8 (51-74) | 1 (1.97x10 <sup>-5</sup> )  | 69               | 0.20                                                              | Benign Moderate                | 0.19                                                                                | Benign Moderate                | 0.09                                                    | Benign Moderate                | 0.02                                                | Benign Strong                  | 0.32                                         | Benign Supporting              | 0.06                                                | Benign Moderate                |
| BRCA1 | chr17_41243033_C         | c.4133G>A         | p.(=)               | Likely benign       | 72563       | 50781          | 81 (1.10x10 <sup>-4</sup> ) | 57,916.2 (33-80) | 1 (1.97x10 <sup>-5</sup> )  | 66               | 0.56                                                              | No evidence                    | 0.39                                                                                | Benign Supporting              | 0.23                                                    | Benign Moderate                | 0.05                                                | Benign Strong                  | 1.51                                         | No evidence                    | 0.74                                                | No evidence                    |
| BRCA1 | chr17_41234451_A         | c.4327C>T         | p.(Arg1443*)        | Pathogenic          | 72558       | 50781          | 11 (1.52x10 <sup>-4</sup> ) | 41,88 (26-54)    | 3 (5.91x10 <sup>-5</sup> )  | 63,8 (57-73)     | 526.71                                                            | Pathogenic Very Strong         | 879.97                                                                              | Pathogenic Very Strong         | 72.34                                                   | Pathogenic Strong              | 12.77                                               | Pathogenic Strong              | 348.42                                       | Pathogenic Strong              | 336.34                                              | Pathogenic Strong              |
| BRCA1 | chr17_4123283_A          | c.457A>C          | p.(Ser153Arg)       | Conflicting         | 72559       | 50779          | 7 (9.65x10 <sup>-5</sup> )  | 49,912.5 (27-62) | 3 (5.91x10 <sup>-5</sup> )  | 57,711.4 (45-67) | 0.36                                                              | Benign Supporting              | 0.24                                                                                | Benign Supporting              | 0.14                                                    | Benign Moderate                | 0.03                                                | Benign Strong                  | 1.00                                         | No evidence                    | 0.08                                                | Benign Moderate                |
| BRCA1 | chr17_41226348_C         | c.4675G>A         | p.(Glu155Gly)       | Pathogenic          | 72556       | 50770          | 1 (1.38x10 <sup>-5</sup> )  | 25               | 2 (3.94x10 <sup>-5</sup> )  | 47,541.3 (38-57) | 0.23                                                              | Benign Supporting              | 0.19                                                                                | Benign Moderate                | 0.15                                                    | Benign Moderate                | 0.05                                                | Benign Strong                  | 0.38                                         | Benign Supporting              | 0.29                                                | Benign Supporting              |
| BRCA1 | chr17_41219642_C         | c.5057A>G         | p.(His1686Arg)      | (Likely) pathogenic | 72566       | 50759          | 1 (1.38x10 <sup>-5</sup> )  | 31               | -                           | -                | 5.92                                                              | No evidence                    | 5.92                                                                                | No evidence                    | 6.40                                                    | No evidence                    | 7.54                                                | No evidence                    | 4.06                                         | No evidence                    | 6.74                                                | No evidence                    |
| BRCA1 | chr17_41219619_G         | c.5074G>C>G       | p.(=)               | Uncertain           | 72525       | 50754          | 22 (3.03x10 <sup>-4</sup> ) | 55,712.1 (29-72) | 5 (9.85x10 <sup>-5</sup> )  | 56,610.7 (46-72) | 1.05x10 <sup>-3</sup>                                             | Benign Very Strong             | 3.18x10 <sup>-4</sup>                                                               | Benign Very Strong             | 1.81x10 <sup>-5</sup>                                   | Benign Very Strong             | 8.68x10 <sup>-6</sup>                               | Benign Very Strong             | 4.06                                         | Benign Moderate                | 2.32x10 <sup>-3</sup>                               | Benign Very Strong             |
| BRCA1 | chr17_41215947_C         | c.5096G>T         | p.(Arg1699Leu)      | Uncertain           | 72560       | 50780          | 17 (2.34x10 <sup>-4</sup> ) | 50,615.9 (29-76) | 3 (5.91x10 <sup>-5</sup> )  | 63,744.2 (59-76) | 307.47                                                            | Pathogenic Strong              | 304.28                                                                              | Pathogenic Strong              | 63.34                                                   | Pathogenic Strong              | 2.30                                                | No evidence                    | 256.46                                       | Pathogenic Strong              | 255.53                                              | Pathogenic Strong              |
| BRCA1 | chr17_41209164_C         | c.5194-12G>A      | p.(=)               | Pathogenic          | 72564       | 50782          | 1 (1.38x10 <sup>-5</sup> )  | 65               | -                           | -                | 0.52                                                              | No evidence                    | 0.49                                                                                | No evidence                    | 0.47                                                    | Benign Supporting              | 0.49                                                | No evidence                    | 0.67                                         | No evidence                    | 0.73                                                | No evidence                    |
| BRCA1 | chr17_41203189_A         | c.5278-55C>T      | p.?                 | -                   | 72559       | 50778          | 1 (1.38x10 <sup>-5</sup> )  | 28               | -                           | -                | 9.31                                                              | No evidence                    | 8.23                                                                                | No evidence                    | 19.00                                                   | Pathogenic Strong              | 6.78                                                | No evidence                    | 4.54                                         | No evidence                    | 10.05                                               | No evidence                    |
| BRCA1 | chr17_41203002_A         | c.5332-78C>T      | p.?                 | Likely benign       | 72560       | 50780          | 8 (1.10x10 <sup>-4</sup> )  | 58,812.7 (37-71) | 4 (7.88x10 <sup>-5</sup> )  | 67,516.8 (62-76) | 5.50x10 <sup>-3</sup>                                             | Benign Strong                  | 4.78x10 <sup>-3</sup>                                                               | Benign Very Strong             | 1.52x10 <sup>-3</sup>                                   | Benign Very Strong             | 4.02                                                | Benign Strong                  | 4.00                                         | Benign Strong                  | 1.72x10 <sup>-1</sup>                               | Benign Very Strong             |
| BRCA1 | chr17_41201198_A         | c.5346G>T         | p.(Trp1782Cys)      | Not Provided        | 72560       | 50778          | -                           | -                | 1 (1.97x10 <sup>-5</sup> )  | 45               | 2.25                                                              | Benign Supporting              | 0.25                                                                                | Benign Supporting              | 0.14                                                    | Benign Moderate                | 0.07                                                | Benign Moderate                | 0.36                                         | Benign Supporting              | 0.16                                                | Benign Moderate                |
| BRCA1 | chr17_41201121_C         | c.612G>C          | p.(Glu204Phe)       | Conflicting         | 72320       | 50643          | 7 (9.68x10 <sup>-5</sup> )  | 59,945.8 (49-67) | 17 (3.86x10 <sup>-4</sup> ) | 57,510.2 (55-74) | 4.23x10 <sup>-13</sup>                                            | Benign Very Strong             | 2.92x10 <sup>-13</sup>                                                              | Benign Very Strong             | 8.97x10 <sup>-17</sup>                                  | Benign Very Strong             | 5.10x10 <sup>-11</sup>                              | Benign Very Strong             | 1.02x10 <sup>-11</sup>                       | 1.02x10 <sup>-11</sup>         | 1.61                                                | Benign Moderate                |
| BRCA2 | chr13_32972834_AA_INDEL  | c.10184del        | p.(Glu3395Glyfs*32) | Conflicting         | 72549       | 50774          | 2 (2.76x10 <sup>-5</sup> )  | 51,2 (47-65)     | -                           | -                | 1.47                                                              | No evidence                    | 1.41                                                                                | No evidence                    | 1.22                                                    | No evidence                    | 1.38                                                | No evidence                    | 1.88                                         | No evidence                    | 1.76                                                | No evidence                    |
| BRCA2 | chr13_32970611_G         | c.1096T>G         | p.(Leu366Val)       | Conflicting         | 72447       | 50706          | 1 (1.38x10 <sup>-5</sup> )  | 52               | 3 (5.92x10 <sup>-5</sup> )  | 54,22.9 (37-80)  | 0.04                                                              | No evidence                    | 0.03                                                                                | Benign Strong                  | 0.01                                                    | Benign Strong                  | 0.04                                                | Benign Strong                  | 0.05                                         | Benign Strong                  | 0.04                                                | Benign Strong                  |
| BRCA2 | chr13_32970758_G         | c.1463T>C         | p.(Ile488Arg)       | Benign              | 72559       | 50777          | 1 (1.38x10 <sup>-5</sup> )  | 74               | 4 (7.88x10 <sup>-5</sup> )  | 55,813 (38-66)   | 6.44x10 <sup>-3</sup>                                             | Benign Strong                  | 6.22x10 <sup>-3</sup>                                                               | Benign Strong                  | 2.88x10 <sup>-1</sup>                                   | Benign Very Strong             | 2.17x10 <sup>-4</sup>                               | Benign Very Strong             | 8.52x10 <sup>-1</sup>                        | Benign Strong                  | 4.57x10 <sup>-1</sup>                               | Benign Strong                  |
| BRCA2 | chr13_32970739_A         | c.1744A>G         | p.(Thr582Pro)       | Benign              | 72564       | 50781          | 1 (1.38x10 <sup>-5</sup> )  | 55               | 1 (1.97x10 <sup>-5</sup> )  | 65               | 0.35                                                              | Benign Supporting              | 0.32                                                                                | Benign Supporting              | 0.11                                                    | Benign Moderate                | 0.09                                                | Benign Moderate                | 0.31                                         | Benign Supporting              | 0.32                                                | Benign Supporting              |
| BRCA2 | chr13_32970433_C         | c.1788T>C         | p.(=)               | Benign              | 72548       | 50772          | 34 (4.69x10 <sup>-4</sup> ) | 58,135.3 (31-76) | 18 (3.55x10 <sup>-4</sup> ) | 54,616 (22-75)   | 3.02x10 <sup>-5</sup>                                             | Benign Very Strong             | 1.10x10 <sup>-5</sup>                                                               | Benign Very Strong             | 6.94x10 <sup>-12</sup>                                  | Benign Very Strong             | 1.01x10 <sup>-7</sup>                               | Benign Very Strong             | 1.51x10 <sup>-3</sup>                        | Benign Strong                  | 1.54x10 <sup>-3</sup>                               | Benign Very Strong             |
| BRCA2 | chr13_32899377_G         | c.231T>G          | p.(=)               | Benign              | 72559       | 50774          | 2 (2.76x10 <sup>-5</sup> )  | 34,546.4 (30-39) | 2 (3.94x10 <sup>-5</sup> )  | 55,615.6 (44-66) | 0.67                                                              | No evidence                    | 0.58                                                                                | No evidence                    | 0.23                                                    | Benign Supporting              | 0.23                                                | Benign Supporting              | 0.43                                         | Benign Supporting              | 1.29                                                | No evidence                    |
| BRCA2 | chr13_32911030_A         | c.2358A>C         | p.(=)               | Benign              | 72560       | 50780          | 18 (2.48x10 <sup>-4</sup> ) | 57,310.7 (33-73) | 8 (1.58x10 <sup>-4</sup> )  | 56,815.6 (30-74) | 4.40x10 <sup>-3</sup>                                             | Benign Strong                  | 3.62x10 <sup>-3</sup>                                                               | Benign Strong                  | 1.55x10 <sup>-4</sup>                                   | Benign Very Strong             | 1.23x10 <sup>-4</sup>                               | Benign Very Strong             | 5.03x10 <sup>-3</sup>                        | Benign Strong                  | 1.06x10 <sup>-3</sup>                               | Benign Very Strong             |
| BRCA2 | chr13_32911172_A         | c.2680G>A         | p.(Val894Ile)       | Benign              | 72557       | 50777          | 18 (2.48x10 <sup>-4</sup> ) | 54,211.3 (35-74) | 16 (3.15x10 <sup>-4</sup> ) | 54,347.7 (34-79) | 2.76x10 <sup>-6</sup>                                             | Benign Very Strong             | 3.07x10 <sup>-6</sup>                                                               | Benign Very Strong             | 3.05x10 <sup>-13</sup>                                  | Benign Very Strong             | 2.44x10 <sup>-7</sup>                               | Benign Very Strong             | 4.42x10 <sup>-6</sup>                        | Benign Very Strong             | 4.42x10 <sup>-6</sup>                               | Benign Very Strong             |
| BRCA2 | chr13_32911565_A         | c.3073A>G         | p.(Lys1025Glu)      | Conflicting         | 72490       | 50734          | 15 (2.07x10 <sup>-4</sup> ) | 60,311.9 (35-74) | 7 (1.38x10 <sup>-5</sup> )  | 52,441.7 (22-67) | 2.40x10 <sup>-4</sup>                                             | Benign Very Strong             | 1.71x10 <sup>-4</sup>                                                               | Benign Very Strong             | 1.54x10 <sup>-7</sup>                                   | Benign Very Strong             | 3.21x10 <sup>-7</sup>                               | Benign Very Strong             | 8.15x10 <sup>-4</sup>                        | Benign Very Strong             | 4.17x10 <sup>-4</sup>                               | Benign Very Strong             |
| BRCA2 | chr13_32911644_C         | c.3152T>C         | p.(Leu1051Ser)      | Uncertain           | 72557       | 50778          | 4 (5.51x10 <sup>-5</sup> )  | 67,717 (60-77)   | -                           | -                | 0.54                                                              | No evidence                    | 0.43                                                                                | Benign Supporting              | 0.29                                                    | Benign Supporting              | 0.42                                                | Benign Supporting              | 0.92                                         | No evidence                    | 0.50                                                | No evidence                    |
| BRCA2 | chr13_32893467_A         | c.316V>5G>A       | p.(=)               | Pathogenic          | 72564       | 50776          | 1 (1.38x10 <sup>-5</sup> )  | 40               | -                           | -                | 2.54                                                              | No evidence                    | 2.63                                                                                | No evidence                    | 2.84                                                    | No evidence                    | 2.85                                                | No evidence                    | 2.68                                         | No evidence                    | 2.19                                                | No evidence                    |
| BRCA2 | chr13_32911756_C         | c.326A>T          | p.(=)               | Benign              | 72564       | 50780          | 11 (1.52x10 <sup>-4</sup> ) | 55,749.6 (39-68) | 6 (1.18x10 <sup>-4</sup> )  | 61,519.8 (46-72) | 4.50x10 <sup>-3</sup>                                             | Benign Strong                  | 3.10x10 <sup>-3</sup>                                                               | Benign Strong                  | 1.91x10 <sup>-6</sup>                                   | Benign Very Strong             | 6.75x10 <sup>-5</sup>                               | Benign Very Strong             | 8.65x10 <sup>-1</sup>                        | Benign Strong                  | 3.42x10 <sup>-1</sup>                               | Benign Strong                  |
| BRCA2 | chr13_32912174_A         | c.3682A>G         | p.(Asn1228Asp)      | Benign              | 72533       | 50756          | 21 (2.90x10 <sup>-4</sup> ) | 57,749.9 (35-73) | 11 (2.17x10 <sup>-4</sup> ) | 48,511.4 (29-71) | 2.90x10 <sup>-6</sup>                                             | Benign Very Strong             | 2.05x10 <sup>-6</sup>                                                               | Benign Very Strong             | 5.31x10 <sup>-12</sup>                                  | Benign Very Strong             | 4.43x10 <sup>-8</sup>                               | Benign Very Strong             | 1.96x10 <sup>-7</sup>                        | Benign Very Strong             | 5.81x10 <sup>-6</sup>                               | Benign Very Strong             |
| BRCA2 | chr13_32890548_C         | c.39-11C>T        | p.(=)               | Uncertain           | 72565       | 50782          | -                           | -                | 1 (1.97x10 <sup>-5</sup> )  | 45               | 0.37                                                              | Benign Supporting              | 0.37                                                                                | Benign Supporting              | 0.31                                                    | Benign Moderate                | 0.36                                                | Benign Supporting              | 0.37                                         | Benign Supporting              | 0.26                                                | Benign Supporting              |
| BRCA2 | chr13_32890547_INDEL_TCT | c.39-12,39-10del  | p.?                 | Conflicting         | 72563       | 50781          | 3 (4.13x10 <sup>-5</sup> )  | 58,349.5 (51-69) | 6 (1.18x10 <sup>-4</sup> )  | 54,759.5 (44-76) | 2.57x10 <sup>-4</sup>                                             | Benign Very Strong             | 2.61x10 <sup>-4</sup>                                                               | Benign Very Strong             | 8.22x10 <sup>-7</sup>                                   | Benign Very Strong             | 4.61x10 <sup>-6</sup>                               | Benign Very Strong             | 3.36x10 <sup>-4</sup>                        | Benign Very Strong             | 3.17x10 <sup>-4</sup>                               | Benign Very Strong             |
| BRCA2 | chr13_32890555_G         | c.39-4G>T         | p.?                 | Benign              | 72564       | 50779          | 1 (1.38x10 <sup>-5</sup> )  | 65               | 2 (3.94x10 <sup>-5</sup> )  | 40               | 0.04                                                              | Benign Strong                  | 0.04                                                                                | Benign Strong                  | 5.33x10 <sup>-1</sup>                                   | Benign Strong                  | 5.20x10 <sup>-3</sup>                               | Ben                            |                                              |                                |                                                     |                                |
