# Supplementary material for: A Likelihood Ratio Approach for Utilizing Case-Control Data in the Clinical Classification of Rare Sequence Variants: Application to BRCA1 and BRCA2
Source: Hum Mutat. 2023 Sep 14;2023:9961341. doi: 10.1155/2023/9961341 (PMC11080979; doi:10.1155/2023/9961341)
Supplement: Supplementary 1 — Supplementary File 1: Case-control likelihood ratio (LR) method presented in detail. [file 9961341.f1.docx]

**A likelihood ratio approach for utilizing case-control data in the clinical classification of rare sequence variants: application to *BRCA1* and *BRCA2* (Zanti et al. 2022)**

**Supplementary File 1.** Case-control Likelihood ratio (LR) method presented in detail

**Assumptions:**

Assume a dataset with N affected or unaffected individuals, in whom sequencing is performed.

Let be the probability that an individual with genotype *k* remains unaffected at age *t* (survival function).

For a variant carrier (*k* = 1), is given by:

For a non-carrier (*k* = 0), is given by:

Where both and should be calculated for a given variant.

Let bethe corresponding probability that an individual with genotype *k* is affected at age t (hazard function).

, the baseline incidence, which is equals to population incidence and , the age-specific log-relative risks in carriers of an assumed pathogenic variant,are assumed known, where both and are fixed.

**Conditional case-control likelihood ratio (“ccLR”) calculation:**

The likelihood under the alternative hypothesis (H1) (i.e., variant is pathogenic) is given by:

Where the sum is over all possible permutations of the variants (). For individual j, tj is the age at diagnosis or last observation, dj = 0 or 1 is the disease status and vj = 0 or 1 is the variant genotype status.

Under the null hypothesis of no association (H0) (i.e., variant is benign), the corresponding likelihood is:

=1/N!

Since genotypes (vj) take values of 0 and 1, the null hypothesis can be simplified to the combinations:

Where the sum in the denominator is over the unique combinations of genotypes.

Assuming there is just one variant carrier (and *N*-1 non-carriers), the likelihood reduces to:

If there are K number of carriers, and assuming a low rate of carriers, permutations (sampling without replacement) should be equivalent to sampling with replacement, where the resulting likelihood should be approximately equal to:

Under the null hypothesis (H0) the above equals . The likelihood ratio then reduces to:
